1 **BECN1 F121A mutation increases autophagic flux in aged mice and improves aging**  
2 **phenotypes in an organ-dependent manner**

3

4 Salwa Sebti<sup>1#</sup>, Zhongju Zou<sup>1</sup>, Michael U. Shiloh<sup>1,2</sup>

5

6 <sup>1</sup> Department of Internal Medicine, University of Texas Southwestern Medical Center, 5323

7 Harry Hines Boulevard, Dallas, TX 75390, USA;

8 <sup>2</sup> Department of Microbiology, University of Texas Southwestern Medical Center, 5323 Harry

9 Hines Boulevard, Dallas, TX 75390, USA

10

11 # Correspondence to Salwa Sebti: [salwa.sebti@utsouthwestern.edu](mailto:salwa.sebti@utsouthwestern.edu)

12

13

14

15

16

17

18

19

20

21

22

23

24 **Abstract**

25 Autophagy is necessary for lifespan extension in multiple model organisms and autophagy  
26 dysfunction impacts age-related phenotypes and diseases. Introduction of an F121A mutation into  
27 the essential autophagy protein BECN1 constitutively increases basal autophagy in young mice  
28 and reduces cardiac and renal age-related changes in longer-lived *Becn1*<sup>F121A</sup> mutant mice.  
29 However, both autophagic and lysosomal activity have been described to decline with age. Thus,  
30 whether autophagic flux is maintained during aging and whether it is enhanced in *Becn1*<sup>F121A</sup> mice  
31 is unknown. Here we demonstrate that old wild type mice maintained functional autophagic flux  
32 in heart, kidney and skeletal muscle but not liver, and old *Becn1*<sup>F121A</sup> mice had increased  
33 autophagic flux in those same organs compared to wild type. In parallel, *Becn1*<sup>F121A</sup> mice were not  
34 protected against age-associated hepatic phenotypes but demonstrated reduced skeletal muscle  
35 fiber atrophy. These findings identify an organ-specific role for the ability of autophagy to impact  
36 organ aging phenotypes.

37

38

39

40 **Abbreviations:** CQ: chloroquine; GFP: green fluorescent protein; KI: BECN1<sup>F121A</sup> knock-in  
41 mutation; MAP1LC3/LC3: microtubule associated protein 1 light chain 3; PCT: Renal proximal  
42 convoluted tubules

43

## 44 **Introduction**

45 Autophagy is an evolutionary conserved lysosomal degradative process essential for the  
46 maintenance of cellular homeostasis and the promotion of cell survival under stress conditions. As  
47 a result, dysregulation or diminished autophagy activity impacts a wide variety of diseases,  
48 including age-related diseases, as well as in aging<sup>1,2</sup>. Indeed, multiple lines of evidence over the  
49 past 30 years have demonstrated that autophagy activity declines with age in diverse organisms<sup>3</sup>.  
50 Lysosomal protease activity is reduced in aged *C. elegans*<sup>4</sup> and defective lysosomes and  
51 autophagic vacuoles accumulate with age in mouse liver<sup>5,6</sup>. Moreover, the expression of several  
52 macroautophagy/autophagy genes decreases over time in *Drosophila*<sup>7-9</sup>. Likewise in mammals,  
53 levels of the essential autophagy proteins LC3, ATG5 and ATG7 decline with age in mouse brain  
54 as well as both muscle and human muscle<sup>10,11</sup>. In addition to declining during normal aging,  
55 expression of ATG proteins is also reduced in the setting of age-related diseases such as  
56 cardiomyopathy, neurodegenerative diseases and osteoarthritis<sup>12,13</sup>. Genetic studies in organismal  
57 models provided more direct evidence of the importance of autophagy in longevity and confirmed  
58 the original finding that knock-down of the autophagy gene *bec-1* (encoding BECN1) abrogates  
59 the lifespan extension of long-lived mutant worms<sup>14,15</sup>. Similarly, loss-of-function genetic studies  
60 indicate that autophagy is essential for lifespan extension in long-lived flies<sup>3</sup> and reciprocally,  
61 induction of autophagy by the overexpression of ATG8 and ATG1 increases lifespan in flies<sup>7,16</sup>.  
62 Since deletion of autophagy genes results in neonatal lethality in mice<sup>17</sup> and systemic deletion of  
63 autophagy genes in adult mice results in early lethality<sup>18</sup>, genetic studies of autophagy and aging  
64 in mammals have taken advantage of mice with tissue-specific deletion of *Atg* genes<sup>11,19-23</sup>. In  
65 these models, decreased autophagy results in multiple defects including the accumulation of

66 dysfunctional organelles and protein aggregates that are also found in aging tissues of otherwise  
67 non-genetically modified animals<sup>24</sup>.

68 The mammalian protein BECN1, orthologue of the yeast protein Atg6, is an essential component  
69 of the class III phosphatidylinositol 3-kinase (PtdIns3K) complex that promotes initiation of  
70 autophagosome formation. The function of BECN1 in autophagy is negatively regulated by  
71 binding to BCL2. Disruption of the BECN1:BCL2 complex enhances the lipid kinase activity of  
72 the BECN1-PtdIns3K complex and subsequent induction of autophagy<sup>25-27</sup>. Transgenic mice  
73 bearing a *Becn1*<sup>F121A</sup> knock-in (KI) mutation that disrupts BECN1 binding to BCL2 represent a  
74 unique autophagy gain-of-function mouse model that provided genetic evidence that mice with  
75 constitutively increased autophagy have an extended lifespan and improved cardiac and renal  
76 aging<sup>28,29</sup>. In addition, constitutively increased autophagy in *Becn1*<sup>F121A</sup> KI mice also prevented  
77 the age-related decline in neurogenesis and olfaction<sup>30</sup>. Whether autophagy declines in all mouse  
78 tissues equally during aging and whether increased autophagy could alleviate the age-associated  
79 dysfunction of all tissue/organ during aging is unknown. Moreover, a recent study monitoring  
80 autophagy in *C. elegans* during aging demonstrated that autophagic flux is reduced with age in all  
81 tissues/organs but lifespan extension by different interventions relies on autophagy in a tissue-  
82 specific manner<sup>31</sup>. Thus, whereas increased autophagy has been demonstrated to improve mouse  
83 lifespan and healthspan at a whole-body level, the tissue-specific regulation of autophagy during  
84 mammalian aging remains to be explored.

85 In this study, we investigated whether age-related phenotypes could be improved in liver and  
86 skeletal muscle of longer-lived *Becn1*<sup>F121A</sup> KI mice and determined the impact of BECN1<sup>F121A</sup>  
87 mutation on autophagic flux in the liver, heart, kidney and skeletal muscle of old mice.

88

## 89 **Results**

90 We previously reported that the *Becn1*<sup>F121A</sup> knock-in (KI) homozygous mice that have a  
91 constitutive increase of basal autophagy have extended lifespan and delayed age-related cardiac  
92 and renal pathological phenotypes<sup>28</sup>. To further investigate if the KI mutation could delay aging  
93 phenotypes of other organs, we measured lipid accumulation and fibrosis in aged KI and control  
94 (WT) mice. Using 20 month-old WT and KI mice, we analyzed H&E stained tissue sections (Fig.  
95 1A) and quantified the percentage of liver area covered by lipid droplets. Contrary to our  
96 expectations, there was no statistically significant difference in lipid accumulation between old KI  
97 and WT mice, despite a slight trend towards a greater number of KI mice with less lipid content  
98 (Fig. 1B). Next, we evaluated age-related hepatic fibrosis on sections stained with Masson's  
99 trichrome (Fig. 1C and 1D) and similarly, did not observe a statistically significant difference in  
100 liver fibrosis between old KI and WT mice. These results indicated that the KI mutation did not  
101 protect mice from age-related hepatic pathological changes and led us to ask if the level of  
102 autophagy was still higher in the livers of old KI mice compared to old WT mice. Indeed, we  
103 previously demonstrated that the KI mutation increased basal autophagy in mouse livers in 6  
104 month-old young adult mice though it has been well characterized that hepatic autophagy declines  
105 with age<sup>28,32</sup>. To monitor autophagy in old mice, we studied KI and WT mice that had been crossed  
106 to transgenic mice expressing GFP tagged LC3<sup>33,34</sup>. In the livers of old mice, we observed no  
107 difference in the number of GFP-LC3 puncta between KI and WT mice (Fig. 1E and F1). To assess  
108 autophagic flux, we treated mice with the autophagy inhibitor chloroquine (CQ). In CQ treated old  
109 mice, neither KI nor WT mice had a statistically significant increase in accumulation of GFP-LC3  
110 puncta in the livers compared to untreated mice, and similarly, we did not observe a significant  
111 difference in flux when comparing the livers of old KI and WT mice. There was also no change in

112 the protein expression of autophagy receptor and substrate SQTM1/p62 in the livers of old KI and  
113 WT mice as evaluated by western blot, thus confirming similar autophagic flux between old KI  
114 and WT mice in the liver (Fig. 1G). Taken together, these results demonstrate that in contrast to  
115 the livers of young mice, old *Becn1*<sup>F121A</sup> KI mice did not display increased liver autophagy, which  
116 correlated with the inability of the KI mutation to impact liver aging phenotypes.

117

118 We next investigated whether in other organs, the increase in basal autophagy in *Becn1*<sup>F121A</sup> KI  
119 mice was also impaired with age. As age-related cardiac and renal aging is prevented in the KI  
120 mice<sup>28</sup>, we measured autophagic flux in the heart and kidneys of old KI and WT mice expressing  
121 GFP-LC3. Compared to old WT mice, old KI mice had significantly more GFP-LC3 puncta in the  
122 heart (Fig. 2A and B), renal glomeruli (Fig. 2D and E) and renal proximal convoluted tubules  
123 (PCT) (Fig. 2F and G). We observed similar differences in GFP-LC3 puncta in the hearts and  
124 kidneys of old KI vs WT mice treated with CQ to block autophagic flux. Furthermore, in contrast  
125 to liver, CQ treatment further increased the number of puncta in both KI and WT mice, indicating  
126 that autophagic flux remains intact in the hearts and kidneys of 22 month-old mice. We also  
127 showed that the protein level of the autophagy substrate SQTM1/p62 is decreased in the heart and  
128 kidney of old KI mice compared to old WT mice (Fig. 2C and H). Thus, in contrast to liver, hearts  
129 and kidneys of old KI mice demonstrate greater autophagic flux compared to WT mice even at an  
130 advanced age.

131

132 To further investigate the potential of the *Becn1*<sup>F121A</sup> KI mutation to increase autophagy during  
133 aging, we next focused on skeletal muscle. Using KI and WT mice expressing GFP-LC3, we  
134 observed that old KI mice had a statistically significant increased number of GFP-LC3 puncta in

135 skeletal muscle compared to WT mice (Fig. 3A and B). Old KI mice treated with CQ also had a  
136 higher number of GFP-LC3 puncta than WT mice, indicating that autophagic flux is increased in  
137 skeletal muscle of old KI mice. It is worth noting that, like both heart and kidney, autophagic flux  
138 in the skeletal muscle of old mice remains intact as both WT and KI old mice treated with CQ had  
139 more GFP-LC3 puncta than untreated mice (Fig. 3B). The expression level of SQTMI1/p62 is also  
140 lower in the muscle of old KI mice not treated with CQ compared to WT (Fig 3C). Altogether,  
141 these data indicate that old KI mice have increased autophagic flux in skeletal muscle.

142 As increased autophagic flux in the heart and kidneys of old KI mice (Fig. 2) correlates with  
143 improved cardiac and renal aging phenotypes <sup>28</sup>, we next investigated if old KI mice also had  
144 improved skeletal muscle aging phenotypes. One characteristic age-related change in the skeletal  
145 muscle is myofiber atrophy<sup>35,36</sup>. Indeed, when we measured the cross-sectional area of skeletal  
146 muscle fibers in young and old mice, we observed a clear age-related decrease in the muscle fiber  
147 size in WT mice (Fig. 3D and E). While myofiber size decreased with age in KI mice as well, the  
148 impact of aging was much less than in WT mice (Fig. 3D). Median myofiber cross-sectional area  
149 was significantly higher in old KI compared to old WT mice, although median myofiber cross-  
150 sectional area was similar between young KI and WT mice (Fig. 3D). Another characteristic of  
151 muscle aging is an increased heterogeneity in myofiber size, and this phenotype was more evident  
152 in old WT than in old KI mice. When we analyzed the frequency distribution of cross-sectional  
153 area of myofibers, we observed a clear shift towards larger fiber sizes in old KI compared to WT  
154 mice (Fig. 3F) suggesting that KI mice were protected from age-related myofiber atrophy. Thus,  
155 we conclude that old KI mice have increased autophagic flux and delayed muscle aging compared  
156 to old WT mice.

157

## 158 **Discussion**

159 Our study indicates that in old mice, *Becn1*<sup>F121A</sup> KI mutation increases autophagic flux in a tissue-  
160 specific manner and reduces aging phenotypes in the corresponding tissues/organs. Disruption of  
161 BECN1 binding to BCL2 by the KI mutation results in constitutively increased autophagic flux in  
162 all young mouse tissues explored to date: heart, kidneys, liver, skeletal muscles, mammary gland,  
163 adipose tissue, pancreas and brain<sup>28,29,37,38</sup>. However, as lysosomal function and autophagy activity  
164 have been described to decline with age, autophagic flux might also be inhibited. As a result,  
165 measuring autophagy by direct quantification of autophagy markers such as SQTM1/p62 and LC3  
166 by immunoblot or fluorescence imaging under basal conditions may not properly reflect the  
167 autophagy level in aged animals and tissues<sup>3,4</sup>. Here, we investigated if autophagic flux remains  
168 increased by the *Becn1*<sup>F121A</sup> KI mutation in aged animals transgenically expressing GFP-LC3 and  
169 treated or not with the lysosomal inhibitor, chloroquine. Our data indicate that the constitutive  
170 increase in autophagic flux is maintained throughout aging in some tissues such as heart, kidneys  
171 and skeletal muscle but not in others like the liver, thus revealing an unexpected tissue-specificity  
172 in the upregulation of autophagy during mouse aging.

173 Our results also demonstrate that old WT mice maintain an active autophagic flux in the heart,  
174 kidneys and skeletal muscle and this autophagic flux can be increased further in old mice via  
175 expression of the BECN1<sup>F121A</sup> mutant protein. These data also suggest that the concept that  
176 autophagic flux is repressed in old animals is not valid for all tissues, which is consistent with  
177 several studies that have also assessed autophagic flux in old mice using a lysosome inhibitor.  
178 Indeed, hematopoietic stem cells of old mice have an active basal autophagic flux that is even  
179 higher than in young mice<sup>39</sup>. Similarly, a recent study showed that autophagic flux increased with  
180 age in adipose tissue<sup>40</sup>. In line with our results, a study of autophagy in kidney aging found that



181 old mice have higher autophagic flux than young mice in proximal convoluted tubules (PCT) but  
182 that further induction of autophagy in response to starvation only occurred in young mice<sup>38</sup>. Here  
183 we show that as opposed to starvation, the *BECN1*<sup>F121A</sup> KI mutation can further increase  
184 autophagic flux in both PCT and glomeruli, which also maintain active autophagic flux during  
185 aging. Our results indicate that autophagy can be induced in old PCT and supports the hypothesis  
186 proposed by previously that the lack of autophagy response in old PCT in WT mice might be  
187 caused by dysregulation of the signaling pathways mediating autophagy induction in response to  
188 starvation rather than by lysosomal dysfunction preventing proper autophagy activity<sup>38</sup>. As the  
189 age-related renal phenotypes that are exacerbated in autophagy deficient mice are improved in old  
190 *Becn1*<sup>F121A</sup> KI mice, increasing autophagy could represent a potential strategy to alleviate age-  
191 related kidney diseases<sup>28,38</sup>. Autophagic flux is also increased in the hearts of old *Becn1*<sup>F121A</sup> KI  
192 mice, which is also consistent with a recent observation that exercise increases autophagic flux in  
193 old mice even though, as opposed to our result, this study did not detect any flux under basal  
194 resting condition<sup>41</sup>. This difference could be explained by the different assay used to measure flux.  
195 Although both studies used chloroquine to block lysosomal degradation, in the exercise study  
196 autophagy and flux were determined by immunoblot of LC3 and SQTM1/p62, whereas we used  
197 quantification of GFP-LC3 puncta combined with SQTM1/p62 analysis. Nevertheless, whether  
198 through genetic intervention via *BECN1*<sup>F121A</sup> KI mutation, or a physiological intervention via  
199 exercise, both studies show that increased autophagic flux in the heart correlates with decreased  
200 cardiac aging in mice<sup>28,41</sup>. Similarly, our data show that in skeletal muscle, autophagic flux is not  
201 only active in aged mice but also higher in aged *Becn1*<sup>F121A</sup> KI mice and correlates with improved  
202 skeletal muscle aging. Previous studies have shown that autophagy deficiency in skeletal muscle  
203 leads to muscle loss and accumulation of protein aggregates which resemble accelerated muscle

204 aging phenotypes in mice<sup>11</sup>. Likewise, recently caloric restriction was shown to improve skeletal  
205 muscle aging phenotypes and increased the number of autophagosomes, although flux was not  
206 assessed<sup>42</sup>. Our results demonstrate that increased autophagy in old *Becn1*<sup>F121A</sup> KI mice reduces  
207 age-associated skeletal muscle fiber atrophy, and provide supportive evidence for inducing  
208 autophagy as a potential therapeutic strategy to mitigate sarcopenia, the age-related decrease in  
209 skeletal muscle mass and strength.

210

211 In contrast to cardiac, renal and skeletal muscle aging, surprisingly hepatic aging was not improved  
212 in old *Becn1*<sup>F121A</sup> KI mice. Prior work had shown that autophagy deficiency in the liver leads to  
213 multiple dysfunctions such as hepatomegaly, mild injuries and the accumulation of abnormal  
214 organelles and lipid droplets in young mice<sup>22,43,44</sup>. In addition, deficiency in chaperone mediated  
215 autophagy accelerates liver aging<sup>45</sup>. The inability of the KI mutation to affect age-related liver  
216 damage phenotypes correlates with the absence of autophagic flux in old KI mice and absence of  
217 a difference between old KI and WT mice. As opposed to the heart, kidney and skeletal muscle,  
218 the constitutive increase in basal autophagy observed in young KI mice was not maintained with  
219 age in the liver of old KI mice. It is worth noting that the concept of an age-associated decline in  
220 autophagic flux was first established by the observation of decreased lysosomal activity and  
221 accumulation of autophagic and lysosomal vesicles with age in the livers of old mice and rats<sup>5,6,46</sup>.  
222 Even if the *BECN1*<sup>F121A</sup> KI mutation results in increased initiation and maturation of  
223 autophagosomes, downstream events such as reduced autophagosomal-lysosomal fusion and  
224 lysosomal degradation due to age-associated defects in their trafficking would still block  
225 autophagic flux and potentially explain why the *BECN1*<sup>F121A</sup> KI mutation fails to increase  
226 autophagic flux in the livers of old mice<sup>47</sup>. In contrast to our findings, caloric restriction was shown

227 to increase autophagic flux in the liver of old mice but only in female C57BL/6J mice<sup>48</sup>.  
228 Dysfunctions in autophagy flux have also been described in the aging brain<sup>49</sup>. However, our  
229 previous results indicate that age-related decline in autophagy is partially reversed in neural stem  
230 cells of 18 month-old *Becn1*<sup>F121A</sup> KI mice<sup>30</sup>. Further investigation of autophagic flux in different  
231 cell populations of the brain as well as in other organs of old mice are required to better  
232 understanding the tissue-specificity of autophagy regulation during mammalian aging.  
233 Interestingly, though the BECN1<sup>F121A</sup> KI mutation did not improve autophagic flux or the age-  
234 associated changes in the liver of old mice, the benefit of increased autophagy on other organs is  
235 sufficient to extends their lifespan<sup>28</sup>.

236

237 On a technical note, in our fluorescence imaging and analyses we observed an age-dependent  
238 accumulation of lipofuscin aggregates in all tissues, some of which appeared punctate.  
239 Accumulation of such aggregates is a well-established hallmark of aging and was especially  
240 pronounced in liver and PCT. As the lipofuscin fluorescence emission spectrum overlaps with  
241 GFP, punctate lipofuscin aggregates can potentially interfere with quantification of true GFP-LC3  
242 puncta and as such should be carefully excluded.

243

244 To our knowledge, our study is the first to evaluate the autophagic flux in multiple tissues of old  
245 mice and highlights the importance of establishing a systemic evaluation of autophagic flux in  
246 aging mammals. We also demonstrate that increased autophagic flux in some old BECN1<sup>F121A</sup> KI  
247 mouse tissues correlates with improved aging phenotypes in a tissue-specific manner. Overall, our  
248 data suggest that increasing autophagic flux during aging mitigates age-related phenotypes in  
249 multiple tissues.

250

## 251 **Materials and Methods**

### 252 **Mice**

253 *Becn1*<sup>F121A/F121A</sup> knock-in mice were generated in Beth Levine lab and backcrossed for more than  
254 12 generations to C57BL/6J mice (Jackson Laboratories) as described<sup>29,28</sup>. *Becn1*<sup>+/+</sup> (WT)  
255 and *Becn1*<sup>F121A/F121A</sup> (KI) littermate mice were crossed with GFP–LC3 transgenic C57BL/6J  
256 animals<sup>34</sup> and tissues of offspring were used for autophagic flux analyses. Old mice were 20 to  
257 22 month-old littermates and young mice were 5 month-old. Both males and females were used  
258 for all analyses. All animal procedures were performed in accordance with institutional  
259 guidelines and with approval from the UT Southwestern Medical Center Institutional Animal  
260 Care and Use Committee.

### 261 **Autophagy analyses**

262 To assess the autophagic flux in aged mice, 22-month-old homozygous *Becn1*<sup>+/+</sup>;GFP–LC3  
263 or *Becn1*<sup>F121A/F121A</sup>;GFP–LC3 mice were synchronized by a 16 h starvation followed by 3 h of  
264 feeding before treatment with either PBS or chloroquine (50 mg kg<sup>-1</sup>) for 6 h. Mice were then  
265 perfused with 4% paraformaldehyde (PFA) in PBS and tissues were collected and processed for  
266 frozen sectioning as described<sup>28</sup>. The mouse heart, liver, vastus lateralis skeletal muscle and  
267 kidney tissue sections were imaged using a 40× objective on a Zeiss AxioPlan 2 microscope. For  
268 each tissue, the total number of GFP–LC3 puncta was counted per 2,500 μm<sup>2</sup> area (more than 20  
269 randomly chosen fields were used per mouse) and was determined by an observer blinded to  
270 genotype. The average value for each tissue for each mouse was then calculated and graphed.  
271 For western blot analysis, tissues were lysed in ice-cold lysis buffer (Tris-HCl, pH 8, 300 mM,  
272 2% SDS) with cComplete, mini protease (Roche) and Halt phosphatase (Thermo Scientific)

273 inhibitor cocktails for 30 min at 4 °C and the lysates were then centrifuged at 15,000g for 10  
274 min. Cleared lysates were diluted in 2× SDS–PAGE loading buffer and submitted to western  
275 blotting using anti-p62 (GP62-C, Progen, 1:1,000 dilution), anti-LC3B (L7543, Sigma, 1:10,000  
276 dilution), anti-BECN1 (sc-7382, Santa Cruz; 1:500 dilution), anti-BCL2 (sc-7382, Santa Cruz;  
277 1:200 dilution) and anti-actin (sc-47778, Santa Cruz, 1:5,000 dilution) antibodies.

### 278 **Histopathological analyses**

279 Mice were perfused with 4% PFA in PBS before tissue collection, fixation, and preparation of  
280 paraffin-embedded sections for histopathological analyses. Liver sections were stained with  
281 Hematoxylin and Eosin (H&E) then scanned using NanoZoomer 2.0-HT and analyzed using free  
282 NDPView2 software. To determine the lipid accumulation in the liver, each field of H&E stained  
283 liver sections was given a score using the following 4 categories: ≤5% tissue area; ≤25% tissue  
284 area; ≤50% tissue area; ≥50% tissue area with lipid droplets visualized as white empty vesicles  
285 on liver sections. For analyses of hepatic fibrosis, liver sections were stained with Masson’s  
286 trichrome according to the manufacturer’s instructions (ab150686, Abcam) and the sections were  
287 imaged using a 20× objective on a Zeiss AxioPlan 2 microscope. Ten random fields were  
288 evaluated per mouse and each field was given a fibrosis score using the following scale: 0,  
289 absence of damage; 1, ≤1% tissue area; 2, 1–5% tissue area; 3, ≥5% tissue area with fibrosis. The  
290 scores of each field were averaged to give a final fibrosis score for each mouse, ranging from 0  
291 to 3. Quantification of all histopathological analyses was performed by an observer blinded to  
292 genotype.

### 293 **Muscle fiber size analyses**

294 Skeletal muscle sections were staining with anti-laminin-2 (L0663, Sigma, 1:1000 dilution) to  
295 outline the muscles fibers. The average cross-sectional area of vastus lateralis muscles was

296 determined using Myosight plugin<sup>50</sup> for FIJI (Just Image J) software. For old mice, 260 to 270  
297 muscle fibers per mouse and 5 mice per genotype were analyzed. For young mice, 200 muscle  
298 fibers per mouse and 3 mice per genotype were analyzed.

### 299 **Statistical analyses**

300 Data were analyzed using the GraphPad Prism 9 software. Two-tailed unpaired Student's *t*-tests  
301 were used for analyses of autophagy. For the analysis of myofibers CSA, data were analyzed by  
302 two-way ANOVA with correction for multiple comparisons.

303

### 304 **Acknowledgments**

305 We dedicate this article to the memory and legacy of Dr. Beth Levine whose intellectual and  
306 financial contributions were fundamental to this work. We thank Noboru Mizushima for the  
307 GFP-LC3 mice and Lori Nguyen for technical assistance. This work was supported by the  
308 Leducq Foundation grant 15CBD04 (S.S.) and NIH grant 5U19AI142784 (M.U.S.). The authors  
309 would also like to thank Linda W. and Milledge A. Hart III for their generous support of  
310 autophagy research.

311

### 312 **References**

- 313 1. Mizushima N, Levine B. Autophagy in Human Diseases. *N Engl J Med* 2020; 383:1564–  
314 76.
- 315 2. Levine B, Kroemer G. Biological Functions of Autophagy Genes: A Disease Perspective.  
316 *Cell* 2019; 176:11–42.
- 317 3. Hansen M, Rubinsztein DC, Walker DW. Autophagy as a promoter of longevity: insights  
318 from model organisms. *Nat Rev Mol Cell Biol* 2018; 19:579–93.

- 319 4. Sarkis GJ, Ashcom JD, Hawdon JM, Jacobson LA. Decline in protease activities with age  
320 in the nematode *Caenorhabditis elegans*. *Mech Ageing Dev* 1988; 45:191–201.
- 321 5. Donati A, Cavallini G, Paradiso C, Vittorini S, Pollera M, Gori Z, Bergamini E. Age-  
322 related changes in the regulation of autophagic proteolysis in rat isolated hepatocytes. *J*  
323 *Gerontol A Biol Sci Med Sci* 2001; 56:B288-293.
- 324 6. Terman A. The effect of age on formation and elimination of autophagic vacuoles in mouse  
325 hepatocytes. *Gerontology* 1995; 41 Suppl 2:319–26.
- 326 7. Simonsen A, Cumming RC, Brech A, Isakson P, Finley DRS and KD. Promoting basal  
327 levels of autophagy in the nervous system enhances longevity and oxidant resistance in  
328 adult *Drosophila*. *Autophagy* 2007; 4:176–84.
- 329 8. Demontis F, Perrimon N. FOXO/4E-BP signaling in *Drosophila* muscles regulates  
330 organism-wide proteostasis during aging. *Cell* 2010; 143:813–25.
- 331 9. Bai H, Kang P, Hernandez AM, Tatar M. Activin signaling targeted by insulin/dFOXO  
332 regulates aging and muscle proteostasis in *Drosophila*. *PLoS Genet* 2013; 9:e1003941.
- 333 10. Kaushik S, Arias E, Kwon H, Lopez NM, Athonvarangkul D, Sahu S, Schwartz GJ, Pessin  
334 JE, Singh R. Loss of autophagy in hypothalamic POMC neurons impairs lipolysis. *EMBO*  
335 *Rep* 2012; 13:258–65.
- 336 11. Carnio S, LoVerso F, Baraibar MA, Longa E, Khan MM, Maffei M, Reischl M, Canepari  
337 M, Loeffler S, Kern H, et al. Autophagy impairment in muscle induces neuromuscular  
338 junction degeneration and precocious aging. *Cell Rep* 2014; 8:1509–21.
- 339 12. Leidal AM, Levine B, Debnath J. Autophagy and the cell biology of age-related disease.  
340 *Nat Cell Biol* 2018; 20:1338–48.

- 341 13. Vinatier C, Domínguez E, Guicheux J, Caramés B. Role of the Inflammation-Autophagy-  
342 Senescence Integrative Network in Osteoarthritis. *Front Physiol* [Internet] 2018 [cited 2020  
343 Nov 16]; 9. Available from: <https://www.ncbi.nlm.nih.gov/pmc/articles/PMC6026810/>
- 344 14. Meléndez A, Tallóczy Z, Seaman M, Eskelinen E-L, Hall DH, Levine B. Autophagy genes  
345 are essential for dauer development and life-span extension in *C. elegans*. *Science* 2003;  
346 301:1387–91.
- 347 15. Hansen M, Chandra A, Mitic LL, Onken B, Driscoll M, Kenyon C. A Role for Autophagy  
348 in the Extension of Lifespan by Dietary Restriction in *C. elegans*. *PLoS Genet* [Internet]  
349 2008 [cited 2020 Oct 19]; 4. Available from:  
350 <https://www.ncbi.nlm.nih.gov/pmc/articles/PMC2242811/>
- 351 16. Ulgherait M, Rana A, Rera M, Graniel J, Walker DW. AMPK modulates tissue and  
352 organismal aging in a non-cell-autonomous manner. *Cell Rep* 2014; 8:1767–80.
- 353 17. Kuma A, Hatano M, Matsui M, Yamamoto A, Nakaya H, Yoshimori T, Ohsumi Y,  
354 Tokuhiya T, Mizushima N. The role of autophagy during the early neonatal starvation  
355 period. *Nature* 2004; 432:1032–6.
- 356 18. Karsli-Uzunbas G, Guo JY, Price S, Teng X, Laddha SV, Khor S, Kalaany NY, Jacks T,  
357 Chan CS, Rabinowitz JD, et al. Autophagy is required for glucose homeostasis and lung  
358 tumor maintenance. *Cancer Discov* 2014; 4:914–27.
- 359 19. Ho TT, Warr MR, Adelman ER, Lansinger OM, Flach J, Verovskaya EV, Figueroa ME,  
360 Passequé E. Autophagy maintains the metabolism and function of young and old stem cells.  
361 *Nature* 2017; 543:205–10.



- 362 20. Sato S, Uchihara T, Fukuda T, Noda S, Kondo H, Saiki S, Komatsu M, Uchiyama Y,  
363 Tanaka K, Hattori N. Loss of autophagy in dopaminergic neurons causes Lewy pathology  
364 and motor dysfunction in aged mice. *Sci Rep* 2018; 8:2813.
- 365 21. Hara T, Nakamura K, Matsui M, Yamamoto A, Nakahara Y, Suzuki-Migishima R,  
366 Yokoyama M, Mishima K, Saito I, Okano H, et al. Suppression of basal autophagy in  
367 neural cells causes neurodegenerative disease in mice. *Nature* 2006; 441:885–9.
- 368 22. Komatsu M, Waguri S, Ueno T, Iwata J, Murata S, Tanida I, Ezaki J, Mizushima N,  
369 Ohsumi Y, Uchiyama Y, et al. Impairment of starvation-induced and constitutive autophagy  
370 in Atg7-deficient mice. *J Cell Biol* 2005; 169:425–34.
- 371 23. Komatsu M, Waguri S, Chiba T, Murata S, Iwata J, Tanida I, Ueno T, Koike M, Uchiyama  
372 Y, Kominami E, et al. Loss of autophagy in the central nervous system causes  
373 neurodegeneration in mice. *Nature* 2006; 441:880–4.
- 374 24. Rubinsztein DC, Mariño G, Kroemer G. Autophagy and Aging. *Cell* 2011; 146:682–95.
- 375 25. Pattingre S, Tassa A, Qu X, Garuti R, Liang XH, Mizushima N, Packer M, Schneider MD,  
376 Levine B. Bcl-2 antiapoptotic proteins inhibit Beclin 1-dependent autophagy. *Cell* 2005;  
377 122:927–39.
- 378 26. Wei Y, Pattingre S, Sinha S, Bassik M, Levine B. JNK1-mediated phosphorylation of Bcl-2  
379 regulates starvation-induced autophagy. *Mol Cell* 2008; 30:678–88.
- 380 27. Sinha S, Colbert CL, Becker N, Wei Y, Levine B. Molecular basis of the regulation of  
381 Beclin 1-dependent autophagy by the gamma-herpesvirus 68 Bcl-2 homolog M11.  
382 *Autophagy* 2008; 4:989–97.

- 383 28. Fernández ÁF, Sebti S, Wei Y, Zou Z, Shi M, McMillan KL, He C, Ting T, Liu Y, Chiang  
384 W-C, et al. Disruption of the beclin 1-BCL2 autophagy regulatory complex promotes  
385 longevity in mice. *Nature* 2018; 558:136–40.
- 386 29. Rocchi A, Yamamoto S, Ting T, Fan Y, Sadleir K, Wang Y, Zhang W, Huang S, Levine B,  
387 Vassar R, et al. A Becn1 mutation mediates hyperactive autophagic sequestration of  
388 amyloid oligomers and improved cognition in Alzheimer’s disease. *PLoS Genet* 2017;  
389 13:e1006962.
- 390 30. Wang C, Haas M, Yeo SK, Sebti S, Fernández ÁF, Zou Z, Levine B, Guan J-L. Enhanced  
391 autophagy in Becn1F121A/F121A knockin mice counteracts aging-related neural stem cell  
392 exhaustion and dysfunction. *Autophagy* 2021; :1–14.
- 393 31. Chang JT, Kumsta C, Hellman AB, Adams LM, Hansen M. Spatiotemporal regulation of  
394 autophagy during *Caenorhabditis elegans* aging. *eLife* 2017; 6:e18459.
- 395 32. Kaushik S, Tasset I, Arias E, Pampliega O, Wong E, Martinez-Vicente M, Cuervo AM.  
396 Autophagy and the Hallmarks of Aging. *Ageing Res Rev* 2021; :101468.
- 397 33. Klionsky DJ, Abdel-Aziz AK, Abdelfatah S, Abdellatif M, Abdoli A, Abel S, Abeliovich  
398 H, Abildgaard MH, Abudu YP, Acevedo-Arozena A, et al. Guidelines for the use and  
399 interpretation of assays for monitoring autophagy (4th edition)1. *Autophagy* 2021; 17:1–  
400 382.
- 401 34. Mizushima N, Yamamoto A, Matsui M, Yoshimori T, Ohsumi Y. In vivo analysis of  
402 autophagy in response to nutrient starvation using transgenic mice expressing a fluorescent  
403 autophagosome marker. *Mol Biol Cell* 2004; 15:1101–11.

- 404 35. Sakellariou GK, Pearson T, Lightfoot AP, Nye GA, Wells N, Giakoumaki II, Vasilaki A,  
405 Griffiths RD, Jackson MJ, McArdle A. Mitochondrial ROS regulate oxidative damage and  
406 mitophagy but not age-related muscle fiber atrophy. *Sci Rep* 2016; 6:33944.
- 407 36. Brown M, Hasser EM. Complexity of age-related change in skeletal muscle. *J Gerontol A*  
408 *Biol Sci Med Sci* 1996; 51:B117-123.
- 409 37. Vega-Rubín-de-Celis S, Zou Z, Fernández ÁF, Ci B, Kim M, Xiao G, Xie Y, Levine B.  
410 Increased autophagy blocks HER2-mediated breast tumorigenesis. *Proc Natl Acad Sci*  
411 [Internet] 2018 [cited 2021 Dec 31]; Available from:  
412 <https://www.pnas.org/content/early/2018/03/27/1717800115>
- 413 38. Yamamoto S, Kuramoto K, Wang N, Situ X, Priyadarshini M, Zhang W, Cordoba-Chacon  
414 J, Layden BT, He C. Autophagy Differentially Regulates Insulin Production and Insulin  
415 Sensitivity. *Cell Rep* 2018; 23:3286–99.
- 416 39. Warr MR, Binnewies M, Flach J, Reynaud D, Garg T, Malhotra R, Debnath J, Passegué E.  
417 FOXO3A directs a protective autophagy program in haematopoietic stem cells. *Nature*  
418 2013; 494:323–7.
- 419 40. Yamamuro T, Kawabata T, Fukuhara A, Saita S, Nakamura S, Takeshita H, Fujiwara M,  
420 Enokidani Y, Yoshida G, Tabata K, et al. Age-dependent loss of adipose Rubicon promotes  
421 metabolic disorders via excess autophagy. *Nat Commun* 2020; 11:4150.
- 422 41. Cho JM, Park S-K, Ghosh R, Ly K, Ramous C, Thompson L, Hansen M, Mattera MS de  
423 LC, Pires KM, Ferhat M, et al. Late-in-life treadmill training rejuvenates autophagy, protein  
424 aggregate clearance, and function in mouse hearts. *Aging Cell* 2021; 20:e13467.
- 425 42. Gutiérrez-Casado E, Khraiwesh H, López-Domínguez JA, Montero-Guisado J, López-  
426 Lluch G, Navas P, de Cabo R, Ramsey JJ, González-Reyes JA, Villalba JM. The Impact of

- 427 Aging, Calorie Restriction and Dietary Fat on Autophagy Markers and Mitochondrial  
428 Ultrastructure and Dynamics in Mouse Skeletal Muscle. *J Gerontol A Biol Sci Med Sci*  
429 2019; 74:760–9.
- 430 43. Ni H-M, Boggess N, McGill MR, Lebofsky M, Borude P, Apte U, Jaeschke H, Ding W-X.  
431 Liver-specific loss of Atg5 causes persistent activation of Nrf2 and protects against  
432 acetaminophen-induced liver injury. *Toxicol Sci Off J Soc Toxicol* 2012; 127:438–50.
- 433 44. Singh R, Kaushik S, Wang Y, Xiang Y, Novak I, Komatsu M, Tanaka K, Cuervo AM,  
434 Czaja MJ. Autophagy regulates lipid metabolism. *Nature* 2009; 458:1131–5.
- 435 45. Schneider JL, Villarroya J, Diaz-Carretero A, Patel B, Urbanska AM, Thi MM, Villarroya  
436 F, Santambrogio L, Cuervo AM. Loss of hepatic chaperone-mediated autophagy accelerates  
437 proteostasis failure in aging. *Aging Cell* 2015; 14:249–64.
- 438 46. Cuervo AM, Dice JF. Age-related decline in chaperone-mediated autophagy. *J Biol Chem*  
439 2000; 275:31505–13.
- 440 47. Bejarano E, Murray JW, Wang X, Pampliega O, Yin D, Patel B, Yuste A, Wolkoff AW,  
441 Cuervo AM. Defective recruitment of motor proteins to autophagic compartments  
442 contributes to autophagic failure in aging. *Aging Cell* 2018; 17:e12777.
- 443 48. Mitchell SJ, Madrigal-Matute J, Scheibye-Knudsen M, Fang E, Aon M, González-Reyes  
444 JA, Cortassa S, Kaushik S, Gonzalez-Freire M, Patel B, et al. Effects of Sex, Strain, and  
445 Energy Intake on Hallmarks of Aging in Mice. *Cell Metab* 2016; 23:1093–112.
- 446 49. Nieto-Torres JL, Hansen M. Macroautophagy and aging: The impact of cellular recycling  
447 on health and longevity. *Mol Aspects Med* 2021; :101020.
- 448 50. Babcock LW, Hanna AD, Agha NH, Hamilton SL. MyoSight—semi-automated image  
449 analysis of skeletal muscle cross sections. *Skelet Muscle* 2020; 10:33.

450

451

452 **Figure legends**

453 **Figure 1.** BECN1<sup>F121A</sup> mutation does not improved liver age-related phenotype and does not  
454 increase autophagic flux in old mice. **(A)** Representative images of H&E stained liver sections of  
455 old *Becn1*<sup>+/+</sup> (WT) and *Becn1*<sup>F121A/F121A</sup> (KI) mice. Scale bars, 40  $\mu$ m. **(B)** Distribution of old  
456 mice according to the percentage of liver section area covered by lipid droplets (n=19 for WT,  
457 n=24 for KI). **(C)** Representative images of old WT and KI mice liver sections stained with  
458 Masson trichrome to quantify fibrosis visualized by the presence of collagen in light blue color.  
459 Scale bars, 40  $\mu$ m. **(D)** Distribution of old mice according to their liver fibrosis score. (n=12 for  
460 WT and KI) **(E)** Representative images of GFP-LC3 puncta indicatives of autophagosomes in  
461 the liver of old WT and KI mice that transgenically express GFP-LC3, with or without  
462 chloroquine (CQ) for 6 h. Scale bars, 10  $\mu$ m. **(F)** Quantification of GFP-LC3 puncta with or  
463 without CQ in old WT and KI mice. Data are mean  $\pm$  s.e.m. (n=6 for WT and n=8 for KI without  
464 CQ and n=8 for WT and n=6 for KI with CQ). P values were determined by a two-sided  
465 unpaired t-test. **(G)** Western blot analysis of SQTMI/p62 autophagy marker and actin in the liver  
466 of old WT and KI mice. Shown are representative western blots of 3 independent experiments.

467

468 **Figure 2.** Autophagic flux is maintained in the heart and kidneys of old mice and is further  
469 increased by BECN1<sup>F121A</sup> mutation. Representative images of GFP-LC3 puncta indicatives of  
470 autophagosomes in the heart **(A)**, in the kidney's glomeruli **(D)** and proximal convoluted tubules  
471 (PCT) **(G)** of old *Becn1* WT and KI mice that transgenically express GFP-LC3, with or without  
472 chloroquine (CQ) for 6 h. Scale bars, 10  $\mu$ m. Quantification of GFP-LC3 puncta with or without  
473 CQ in the heart **(B)**, in the kidney's glomeruli **(E)** and PCT **(H)** of old *Becn1* WT and KI mice.  
474 Data are mean  $\pm$  s.e.m. (n=6 for WT and n=8 for KI without CQ in all tissues and n=6 for KI and

475 n=7-8 for WT with CQ). P values were determined by a two-sided unpaired t-test. Western blot  
476 analysis of SQTMI/p62 autophagy marker and actin, in the heart (C) and in the kidneys (F) of old  
477 *Becn1* WT and KI mice. Shown are representative western blots of 3 independent experiments.

478 **Figure 3.** BECN1<sup>F121A</sup> mutation increases autophagic flux in the skeletal muscle of old mice and  
479 prevents age-related decrease muscle fiber size. (A) Representative images of GFP-LC3 puncta  
480 indicatives of autophagosomes in the vastus lateralis of old *Becn1* WT and KI mice that  
481 transgenically express GFP-LC3, with or without chloroquine (CQ) for 6 h. (B) Quantification of  
482 GFP-LC3 puncta with or without CQ in old WT and KI mice. Data are mean  $\pm$  s.e.m. (n=6 for  
483 WT and n=8 for KI without CQ and n=7 for WT and n=6 for KI with CQ). (C) Western blot  
484 analysis of SQTMI/p62 autophagy marker and actin, in the liver of old *Becn1* WT and KI mice.  
485 Shown are representative western blots of 3 independent experiments. (D) Cross-sectional area  
486 (CSA) of skeletal muscle fibers of the vastus lateralis muscle of young (5 month-old) and old (20  
487 month-old) WT and KI mice (n=3 per group for young mice and n=5 per group for old mice).  
488 Graphs represents median CSA and interquartile and all myofiber CSA values are shown. (E)  
489 Representative images of vastus lateralis skeletal muscle sections of old WT and KI mice stained  
490 with a laminin antibody to outline the myofibers and DAPI. (F) Frequency of distribution of old  
491 WT and KI mice muscle fibers CSA (n=5 mice per group). Data represented as histograms of fiber  
492 size per CSA bin with 700  $\mu\text{m}^2$  width. Scale bars, 10  $\mu\text{m}$ . P values were determined by a two-tailed  
493 ANOVA with correction for multiple comparisons.

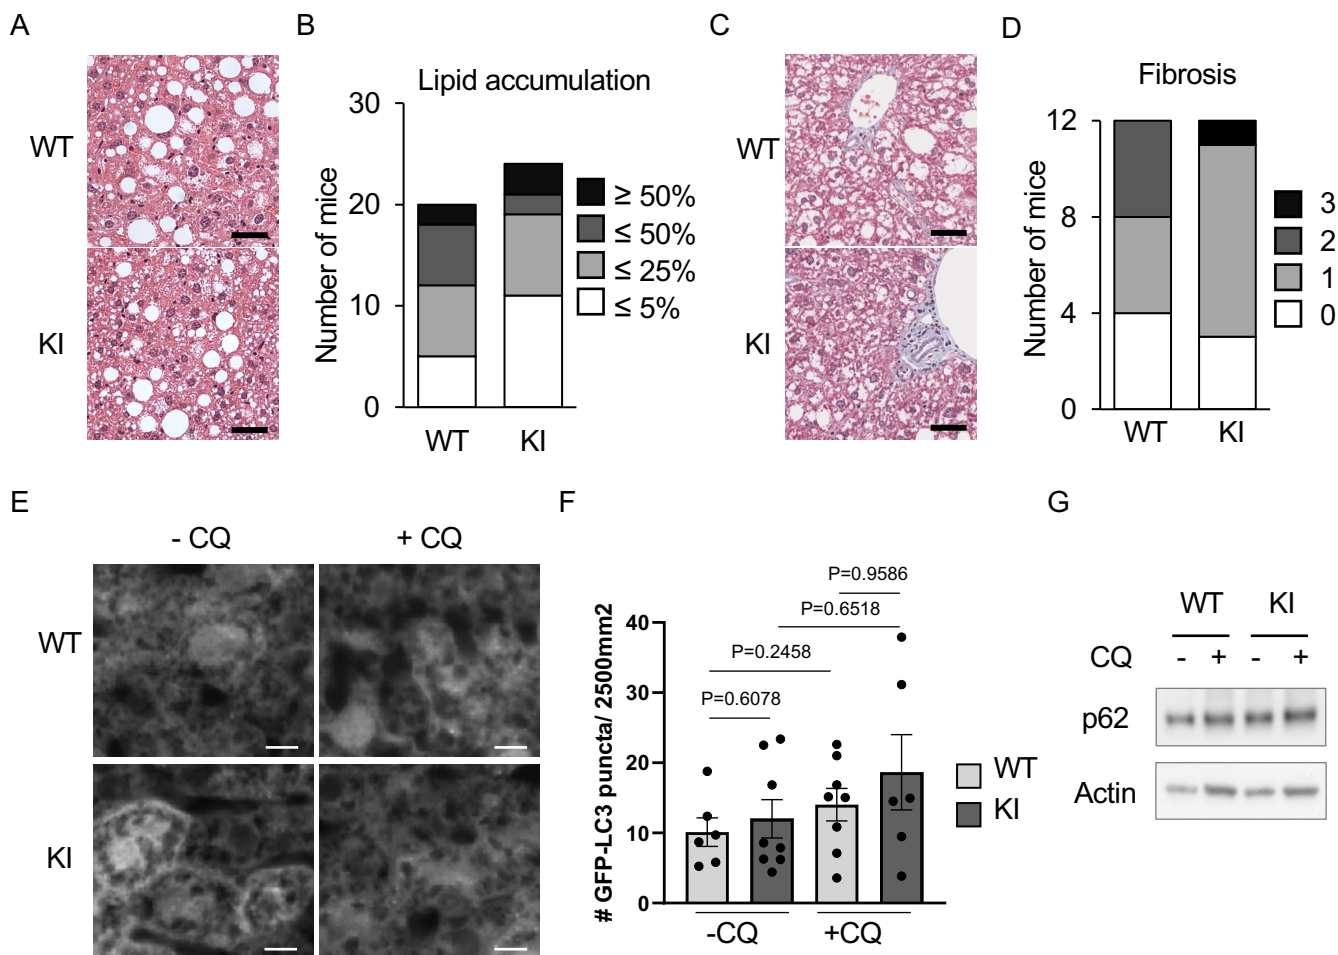

**Figure 1. *BECN1*<sup>F121A</sup> mutation does not improved liver age-related phenotype and does not increase autophagy flux in old mice.** (A) Representative images of H&E stained liver sections of old *Becn1*<sup>+/+</sup> (WT) and *Becn1*<sup>F121A/F121A</sup> (KI) mice. Scale bars, 40  $\mu$ m. (B) Distribution of old mice according to the percentage of liver section area covered by lipid droplets (n=19 for WT, n=24 for KI). (C) Representative images of old WT and KI mice liver sections stained with Masson trichrome to quantify fibrosis visualized by the presence of collagen in light blue color. Scale bars, 40  $\mu$ m. (D) Distribution of old mice according to their liver fibrosis score. (n=12 for WT and KI) (E) Representative images of GFP-LC3 puncta indicatives of autophagosomes in the liver of old WT and KI mice that transgenically express GFP-LC3, with or without chloroquine (CQ) for 6 h. Scale bars, 10  $\mu$ m. (F) Quantification of GFP-LC3 puncta with or without CQ in old WT and KI mice. Data are mean  $\pm$  s.e.m. (n=6 for WT and n=8 for KI without CQ and n=8 for WT and n=6 for KI with CQ). P values were determined by a two-sided unpaired t-test. (G) Western blot analysis of SQTM1/p62 autophagy marker and actin in the liver of old WT and KI mice. Shown are representative western blots of 3 independent experiments.



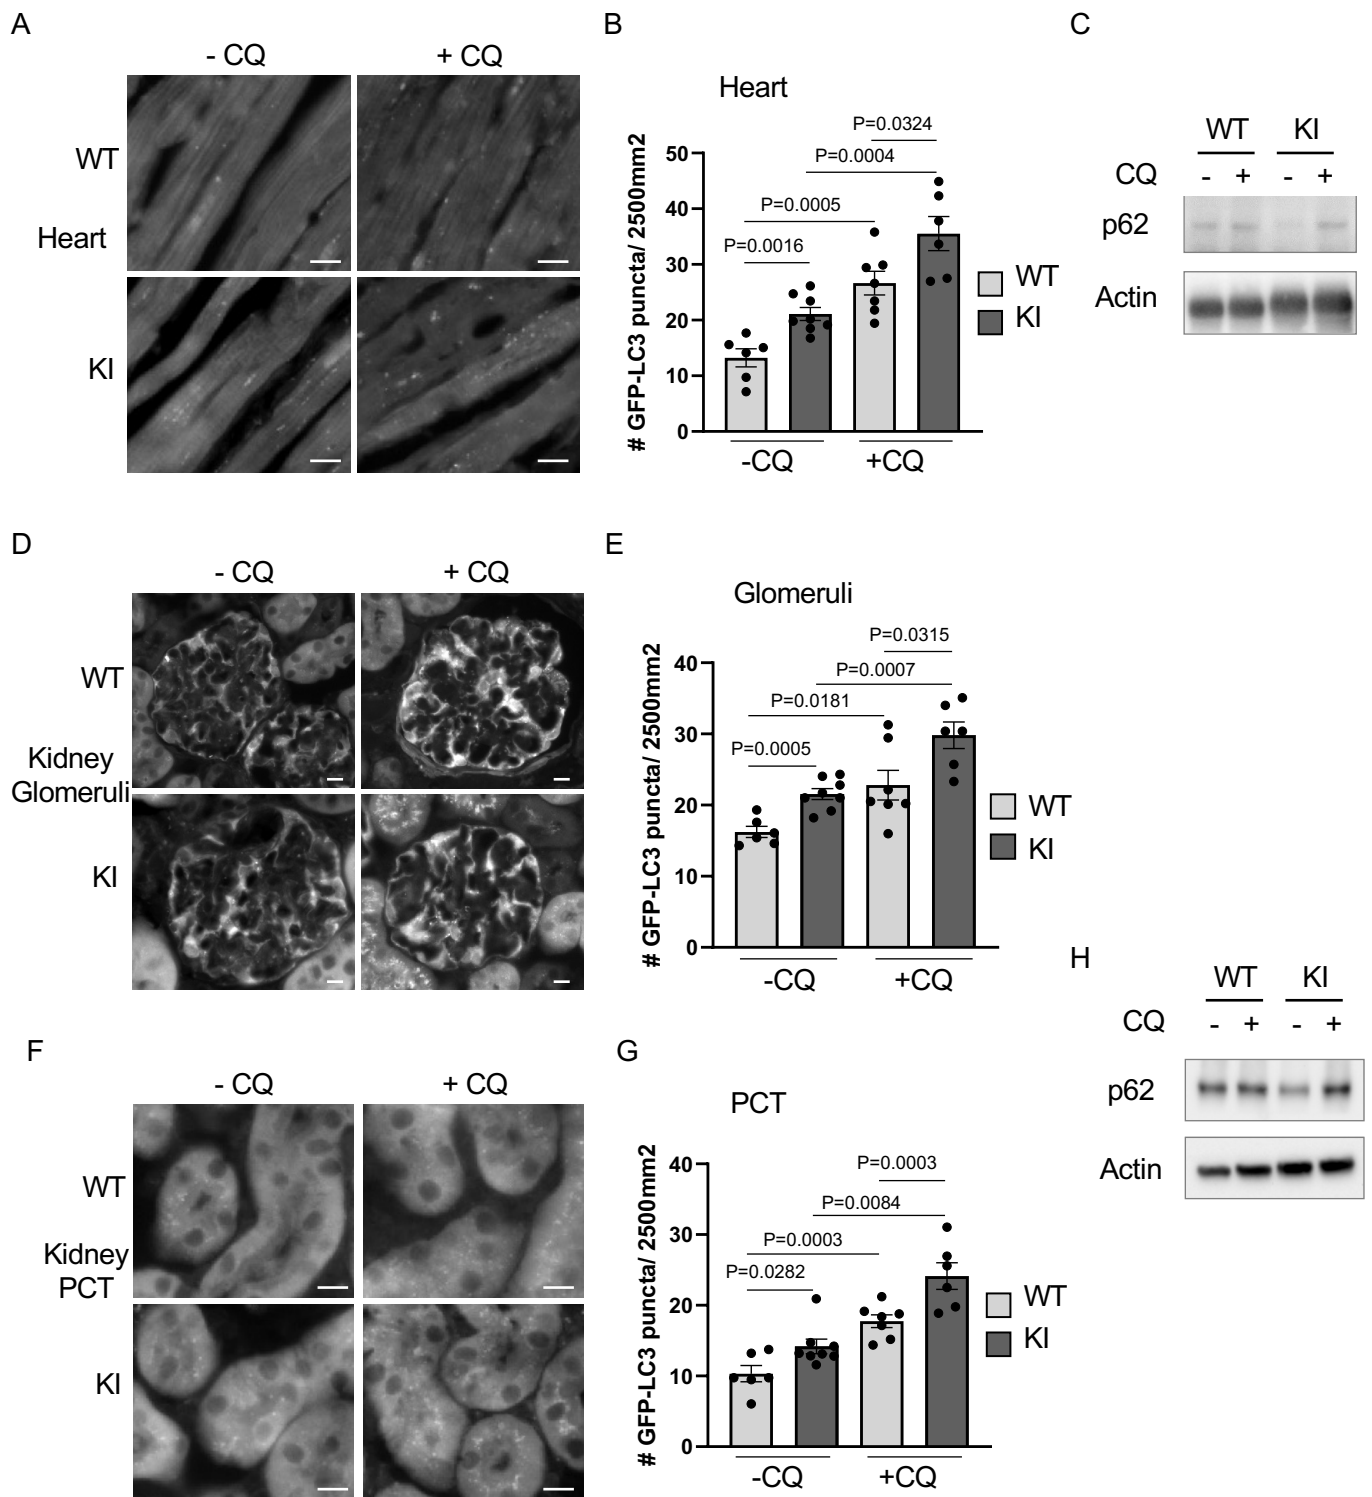

**Figure 2. Autophagy flux is maintained in the heart and kidneys of old mice and is further increased by *BECN1*<sup>F121A</sup> mutation.** Representative images of GFP-LC3 puncta indicative of autophagosomes in the heart (A), in the kidney's glomeruli (D) and proximal convoluted tubules (PCT) (G) of old *Beclin1* WT and KI mice that transgenically express GFP-LC3, with or without chloroquine (CQ) for 6 h. Scale bars, 10  $\mu$ m. Quantification of GFP-LC3 puncta with or without CQ in the heart (B), in the kidney's glomeruli (E) and PCT (H) of old *Beclin1* WT and KI mice. Data are mean  $\pm$  s.e.m. (n=6 for WT and n=8 for KI without CQ in all tissues and n=6 for KI and n=7-8 for WT with CQ). P values were determined by a two-sided unpaired t-test. Western blot analysis of SQTM1/p62 autophagy marker and actin, in the heart (C) and in the kidneys (F) of old *Beclin1* WT and KI mice. Shown are representative western blots of 3 independent experiments.

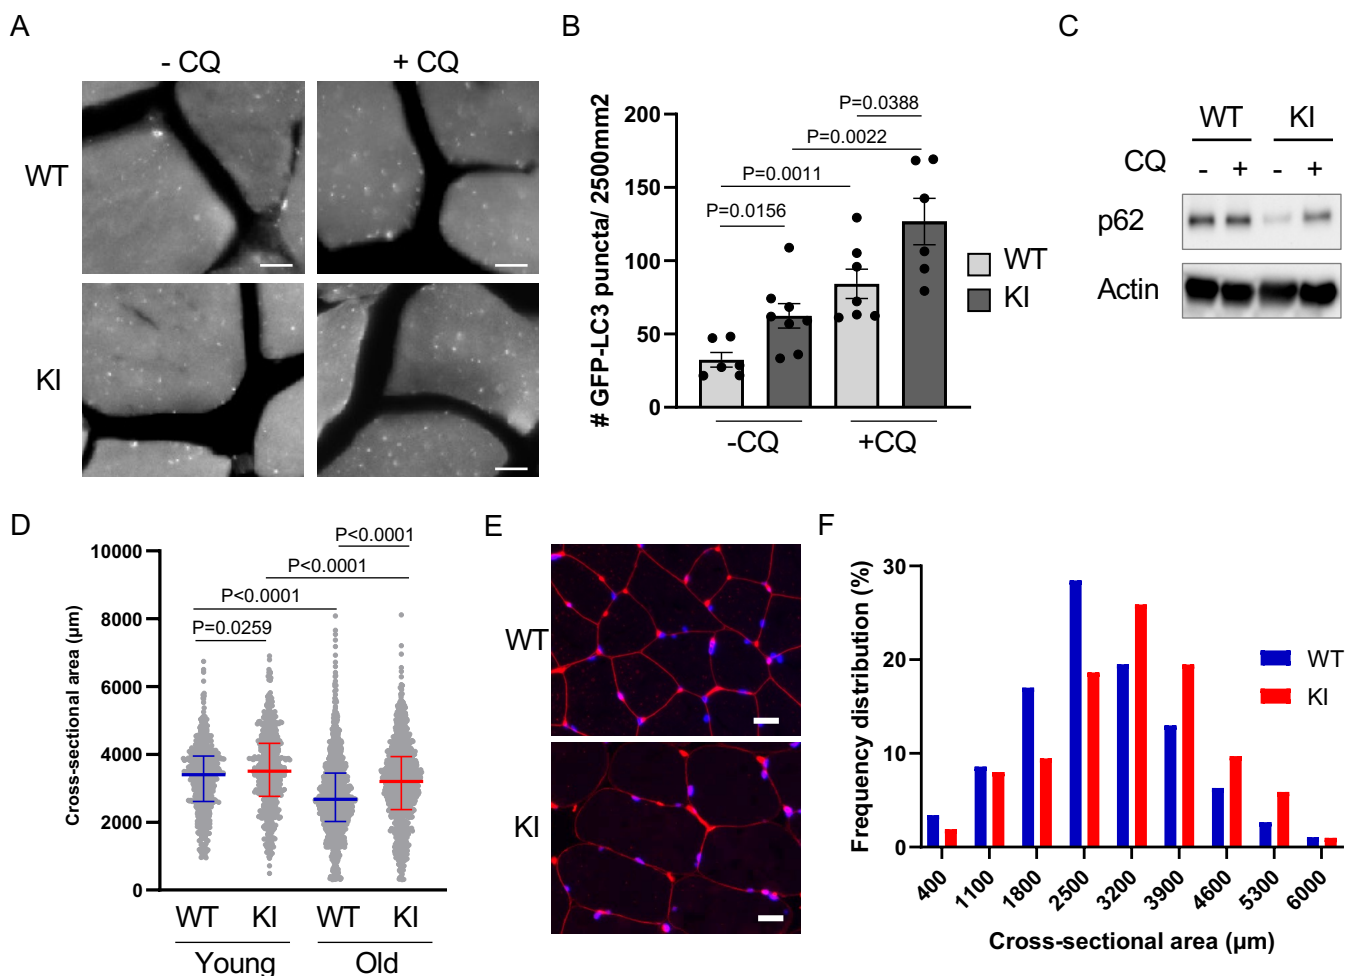

**Figure 3. BECN1F121A mutation increases autophagic flux in the skeletal muscle of old mice and prevents age-related decrease muscle fiber size.** (A) Representative images of GFP-LC3 puncta indicatives of autophagosomes in the vastus lateralis of old *Becn1* WT and KI mice that transgenically express GFP-LC3, with or without chloroquine (CQ) for 6 h. (B) Quantification of GFP-LC3 puncta with or without CQ in old WT and KI mice. Data are mean  $\pm$  s.e.m. (n=6 for WT and n=8 for KI without CQ and n=7 for WT and n=6 for KI with CQ). (C) Western blot analysis of SQTM1/p62 autophagy marker and actin, in the liver of old *Becn1* WT and KI mice. Shown are representative western blots of 3 independent experiments. (D) Cross-sectional area (CSA) of skeletal muscle fibers of the vastus lateralis muscle of young (5 month-old) and old (20 month-old) WT and KI mice (n=3 per group for young mice and n=5 per group for old mice). Graphs represents median CSA and interquartile and all the myofibers CSA values are shown. (E) Representative images of vastus lateralis skeletal muscle sections of old WT and KI mice stained with a laminin antibody to outline the myofibers and DAPI. (F) Frequency of distribution of old WT and KI mice muscle fibers CSA (n=5 mice per group). Data represented as histograms of fiber size per CSA bin with 700  $\mu\text{m}^2$  width. Scale bars, 10  $\mu\text{m}$ . P values were determined by a two-tailed ANOVA with correction for multiple comparisons.
